# Supplementary material
Source: PubMed Central journal article supplement (PMC3809992)
Supplement: NIHMS517706-supplement-01.pdf [file NIHMS517706-supplement-01.pdf]

## Supplementary Tables

Supplementary Table 1. Desmosomal mutations represented in the study population

| Gene; n (%)          | Amino Acid Change     | Nucleotide Change | Overall<br>n=87 (# families) |
|----------------------|-----------------------|-------------------|------------------------------|
| <b>PKP2; 76 (87)</b> | Mutant splice product | 2146-1G->C        | 18 (9)                       |
|                      | Mutant splice product | 2489+1G>A         | 10 (5)                       |
|                      | A733fsX740            | 2197_2202delinsG  | 7 (4)                        |
|                      | W538X                 | 1613G>A           | 6 (4)                        |
|                      | R79X                  | 235C>T            | 5 (4)                        |
|                      | P672fsX683            | 2013delC          | 5 (1)                        |
|                      | V837fsX930            | 2509delA          | 4 (2)                        |
|                      | Mutant splice product | 337-2A>T          | 4 (1)                        |
|                      | P323fsX350            | 968_971delAGGC    | 3 (1)                        |
|                      | S587fsX69             | 1759delG          | 3 (1)                        |
|                      | Q617X                 | 1849C>T           | 2 (1)                        |
|                      | S406fsX4              | 1211-1212insT     | 1 (1)                        |
|                      | F424S                 | 1271T>C           | 1 (1)                        |
|                      | Splicing change       | 2145+1G>A         | 1 (1)                        |
|                      | Mutant splice product | 224-3C>G          | 1 (1)                        |
|                      | R413X                 | 1237C>T           | 1 (1)                        |
|                      | S50fsX110             | 148_151delACAG    | 1 (1)                        |
|                      | L787F                 | 2359C>T           | 1 (1)                        |
|                      | Q74fsX85              | 218dupG           | 1 (1)                        |
| V548fsX562           | 1643delG              | 1 (1)             |                              |
| <b>DSG2; 7 (8)</b>   | R46Q                  | 137G>A            | 2 (1)                        |
|                      | C507Y                 | 1520G>A           | 2 (1)                        |
|                      | G812C                 | 2434G>T           | 1 (1)                        |
|                      | K346del               | 1038_1040delGAA   | 1 (1)                        |
|                      | T335A                 | 1003A>G           | 1 (1)                        |
| <b>DSP; 3 (3)</b>    | E422K                 | 1264G>A           | 1 (1)                        |
|                      | R2160X                | 6478C>T           | 1 (1)                        |
|                      | V30M                  | 88G>A             | 1 (1)                        |
| <b>DSC2; 1 (1)</b>   | E426K                 | 1276G>A           | 1 (1)                        |

Abbreviations: *DSC2*: Desmocollin-2, *DSG2*: desmoglein-2, *DSP*: Desmoplakin, *PKP2*: Plakophilin-2
